# Supplementary material for: Comparative Genomics of 42 Arcanobacterium phocae Strains
Source: MDPI journal article supplement (doi:10.3390/antibiotics10060740), 2021-06-18
Supplement: s1 [file s1]

S-Table S2 A general overview of the 42 *Arcanobacterium phocae* isolates and genomes

| Strain    | Host<br>source | Isolation<br>location | Geographic<br>region          | Year | Accession<br>nro | Status   | Coverage | Contigs | Size<br>(Mbps) | G+C<br>(%) | ORFs | Proteins | Ref.        |
|-----------|----------------|-----------------------|-------------------------------|------|------------------|----------|----------|---------|----------------|------------|------|----------|-------------|
| APH37     | mink           | skin                  | Ostrobothnia                  | 2009 | SAMN14609993     | draft    | 89x      | 106     | 2.00           | 50.1       | 1997 | 1904     | This study  |
| APH40     | finnraccoon    | skin                  | Northern Ostrobothnia         | 2009 | SAMN14609994     | draft    | 41x      | 107     | 1.98           | 50.0       | 1962 | 1856     | This study  |
| APH41     | blue fox       | eye discharge         | Northern Ostrobothnia         | 2009 | SAMN14609995     | draft    | 61x      | 106     | 1.98           | 50.0       | 1961 | 1859     | This study  |
| APH67     | mink           | eyelid                | Central Ostrobothnia          | 2010 | SAMN14609996     | draft    | 49x      | 106     | 1.98           | 50.0       | 1953 | 1853     | This study  |
| APH81     | mink           | skin                  | Central Ostrobothnia          | 2010 | SAMN14609997     | draft    | 56x      | 86      | 1.97           | 50.0       | 1947 | 1870     | This study  |
| APH96     | finnraccoon    | paw pad               | Northern Ostrobothnia         | 2011 | SAMN14609998     | draft    | 66x      | 207     | 2.05           | 50.6       | 2091 | 2005     | This study  |
| APH98     | blue fox       | eye discharge         | Pirkanmaa                     | 2011 | SAMN14609999     | draft    | 70x      | 92      | 1.97           | 50.0       | 1961 | 1876     | This study  |
| APH105    | mink           | skin                  | Central Ostrobothnia          | 2012 | SAMN14610000     | draft    | 65x      | 99      | 1.98           | 50.0       | 1957 | 1865     | This study  |
| APH107    | mink           | paw pad               | Central Ostrobothnia          | 2012 | SAMN14610001     | draft    | 55x      | 109     | 1.98           | 50.0       | 1977 | 1885     | This study  |
| APH122    | mink           | lung                  | Ostrobothnia                  | 2013 | SAMN14610002     | draft    | 72x      | 93      | 1.97           | 50.0       | 1943 | 1853     | This study  |
| APH127    | mink           | lung                  | Ostrobothnia                  | 2014 | SAMN14610003     | draft    | 91x      | 101     | 1.99           | 50.2       | 1989 | 1889     | This study  |
| APH130    | mink           | paw pad               | Northern Ostrobothnia         | 2015 | SAMN14610004     | draft    | 86x      | 111     | 1.98           | 50.0       | 1971 | 1869     | This study  |
| DSM 10002 | seal           | lung                  | coastal waters (Scotland, UK) | 1995 | SAMN04489737     | complete | 882x     | 1       | 2.00           | 50.0       | 1801 | 1697     | Unpublished |
| 52753     | finnraccoon    | claw                  | Denmark                       | 2013 | SAMN14610006     | Draft    | 66x      | 29      | 1.93           | 50         | 1740 | 1687     | This study  |

|        |              |                             |         |      |                |       |       |     |      |       |       |      |            |
|--------|--------------|-----------------------------|---------|------|----------------|-------|-------|-----|------|-------|-------|------|------------|
| 12814  | mink         | fluid thorax                | Denmark | 2015 | SAMN 146100 07 | Draft | 62x   | 40  | 1.92 | 50    | 172 6 | 1673 | This study |
| 12817  | mink         | skin                        | Denmark | 2015 | SAMN 146100 08 | Draft | 60x   | 28  | 1.93 | 50    | 174 2 | 1689 | This study |
| 12824  | mink         | digit                       | Denmark | 2015 | SAMN 146100 09 | Draft | 51x   | 40  | 1.93 | 50    | 173 8 | 1684 | This study |
| 13645  | mink         | lungs                       | Denmark | 2015 | SAMN 146100 10 | Draft | 64x   | 23  | 1.94 | 50. 1 | 177 2 | 1718 | This study |
| 13808  | mink         | thorax                      | Denmark | 2015 | SAMN 146100 11 | Draft | 96x   | 26  | 1.93 | 50    | 174 1 | 1688 | This study |
| 14235  | mink         | skin                        | Denmark | 2015 | SAMN 146100 12 | Draft | 76x   | 30  | 1.92 | 50    | 173 6 | 1683 | This study |
| 20171  | otter        | abscess                     | Denmark | 2015 | SAMN 146100 13 | Draft | 92x   | 11  | 1.86 | 50. 1 | 163 6 | 1584 | This study |
| 22705  | spotted seal | pharynx                     | Denmark | 2015 | SAMN 146100 14 | Draft | 68x   | 24  | 1.96 | 49. 9 | 173 3 | 1680 | This study |
| 22711  | grey seal    | claw                        | Denmark | 2015 | SAMN 146100 15 | Draft | 68x   | 14  | 1.87 | 50. 1 | 167 1 | 1618 | This study |
| 11692  | mink         | nose                        | Denmark | 2017 | SAMN 146100 16 | Draft | 97x   | 31  | 1.93 | 50    | 174 3 | 1689 | This study |
| 22984  | spotted seal | lesion (right back flipper) | Denmark | 2015 | SAMN 146100 17 | Draft | 57x   | 19  | 1.88 | 50. 1 | 167 5 | 1620 | This study |
| 22985  | spotted seal | lesion                      | Denmark | 2015 | SAMN 146100 18 | Draft | 70x   | 143 | 2.04 | 49. 9 | 182 7 | 1777 | This study |
| 4114   | mink         | digit                       | Denmark | 2015 | SAMN 146100 19 | Draft | 78x   | 36  | 1.92 | 50    | 173 3 | 1680 | This study |
| 4544   | mink         | skin                        | Denmark | 2015 | SAMN 146100 20 | Draft | 69x   | 23  | 1.99 | 50. 4 | 182 0 | 1766 | This study |
| 11893  | mink         | lung                        | Denmark | 2017 | SAMN 146100 21 | Draft | 103 x | 27  | 1.93 | 50    | 173 7 | 1684 | This study |
| 12172  | mink         | fluid                       | Denmark | 2017 | SAMN 146100 22 | Draft | 70x   | 27  | 1.93 | 50    | 174 6 | 1690 | This study |
| 14592  | mink         | lungs                       | Denmark | 2017 | SAMN 146100 23 | Draft | 57x   | 25  | 1.94 | 50. 1 | 176 9 | 1715 | This study |
| ARC106 | mink         | lung                        | Finland | 2012 | SAMN 146100 24 | Draft | 73x   | 23  | 1.95 | 50. 1 | 177 0 | 1717 | This study |

|              |      |             |                       |      |                      |       |     |    |      |          |          |      |               |
|--------------|------|-------------|-----------------------|------|----------------------|-------|-----|----|------|----------|----------|------|---------------|
| ARC109       | mink | skin        | Finland               | 2013 | SAMN<br>146100<br>25 | Draft | 57x | 29 | 1.93 | 50       | 174<br>2 | 1687 | This<br>study |
| ARC127       | mink | lung        | Finland               | 2014 | SAMN<br>146100<br>26 | Draft | 74x | 20 | 1.94 | 50.<br>1 | 176<br>7 | 1714 | This<br>study |
| ARC131       | mink | absces<br>s | Finland               | 2015 | SAMN<br>146100<br>27 | Draft | 68x | 29 | 1.93 | 50       | 173<br>8 | 1685 | This<br>study |
| SBAK87<br>2  | mink | skin        | Finland               | 2016 | SAMN<br>146100<br>28 | Draft | 74x | 17 | 1.94 | 50.<br>1 | 176<br>0 | 1707 | This<br>study |
| ARCAN<br>O14 | mink | UN          | The<br>Netherla<br>nd | 2012 | SAMN<br>146100<br>29 | Draft | 72x | 31 | 1.94 | 49.<br>9 | 174<br>5 | 1692 | This<br>study |
| ARCAN<br>O19 | mink | UN          | The<br>Netherla<br>nd | 2013 | SAMN<br>146100<br>30 | Draft | 70x | 31 | 1.94 | 50       | 175<br>2 | 1698 | This<br>study |
| ARCAN<br>O21 | mink | UN          | The<br>Netherla<br>nd | 2013 | SAMN<br>146100<br>31 | Draft | 87x | 20 | 1.95 | 50.<br>1 | 177<br>5 | 1722 | This<br>study |
| IN-1A        | mink | UN          | Spain                 | 2014 | SAMN<br>146100<br>32 | Draft | 61x | 21 | 1.95 | 50.<br>1 | 179<br>7 | 1746 | This<br>study |
| IN-4A        | mink | UN          | Spain                 | 2015 | SAMN<br>146100<br>33 | Draft | 43x | 19 | 1.94 | 50.<br>1 | 176<br>6 | 1714 | This<br>study |
| IN-5A        | mink | UN          | Spain                 | 2015 | SAMN<br>146100<br>34 | Draft | 70x | 13 | 1.86 | 50.<br>1 | 163<br>6 | 1581 | This<br>study |
