# Supplementary material for: Comparative Genomics of 42 Arcanobacterium phocae Strains
Source: MDPI journal article supplement (doi:10.3390/antibiotics10060740), 2021-06-18
Supplement: s1 [file s1]

S-Table S4. The secreted proteins found in the core genome of the 42 *A. phocae* isolates.

|               |             |                            |   |                                                                                         |
|---------------|-------------|----------------------------|---|-----------------------------------------------------------------------------------------|
| BLT51_RS00050 | SignalP-5.0 | signal_peptide             | . | phosphatidylserine/phosphatidylglycerophosphate/<br>cardiolipin synthase family protein |
| BLT51_RS00110 | SignalP-5.0 | signal_peptide             | . | ABC transporter permease                                                                |
| BLT51_RS00165 | SignalP-5.0 | signal_peptide             | . | hypothetical protein                                                                    |
| BLT51_RS00260 | SignalP-5.0 | lipoprotein_signal_peptide | . | hypothetical protein                                                                    |
| BLT51_RS00320 | SignalP-5.0 | lipoprotein_signal_peptide | . | maltose ABC transporter substrate-binding                                               |
| BLT51_RS00340 | SignalP-5.0 | lipoprotein_signal_peptide | . | hypothetical protein                                                                    |
| BLT51_RS00345 | SignalP-5.0 | signal_peptide             | . | hypothetical protein                                                                    |
| BLT51_RS00480 | SignalP-5.0 | signal_peptide             | . | HlyC/CorC family transporter                                                            |
| BLT51_RS00505 | SignalP-5.0 | lipoprotein_signal_peptide | . | ABC transporter substrate-binding protein                                               |
| BLT51_RS00520 | SignalP-5.0 | signal_peptide             | . | hypothetical protein                                                                    |
| BLT51_RS00615 | SignalP-5.0 | signal_peptide             | . | hypothetical protein                                                                    |
| BLT51_RS00715 | SignalP-5.0 | signal_peptide             | . | NADH-quinone oxidoreductase subunit A                                                   |
| BLT51_RS00840 | SignalP-5.0 | signal_peptide             | . | glycerol-3-phosphate dehydrogenase subunit GlpB                                         |
| BLT51_RS00955 | SignalP-5.0 | signal_peptide             | . | D-alanyl-D-alanine<br>D-alanyl-D-alanine-endopeptidase                                  |
| BLT51_RS00965 | SignalP-5.0 | signal_peptide             | . | hypothetical protein                                                                    |
| BLT51_RS00995 | SignalP-5.0 | signal_peptide             | . | bifunctional metallophosphatase/5-nucleotidase                                          |
| BLT51_RS01005 | SignalP-5.0 | signal_peptide             | . | hypothetical protein                                                                    |
| BLT51_RS01185 | SignalP-5.0 | lipoprotein_signal_peptide | . | hypothetical protein                                                                    |
| BLT51_RS01210 | SignalP-5.0 | lipoprotein_signal_peptide | . | ABC transporter substrate-binding protein                                               |
| BLT51_RS01215 | SignalP-5.0 | signal_peptide             | . | hypothetical protein                                                                    |
| BLT51_RS01315 | SignalP-5.0 | signal_peptide             | . | hypothetical protein                                                                    |
| BLT51_RS01355 | SignalP-5.0 | signal_peptide             | . | tryptophan-rich sensory protein                                                         |
| BLT51_RS01370 | SignalP-5.0 | signal_peptide             | . | hypothetical protein                                                                    |
| BLT51_RS01425 | SignalP-5.0 | lipoprotein_signal_peptide | . | sugar ABC transporter substrate-binding protein                                         |
| BLT51_RS01455 | SignalP-5.0 | lipoprotein_signal_peptide | . | thiamine ABC transporter substrate-binding protein                                      |
| BLT51_RS01490 | SignalP-5.0 | lipoprotein_signal_peptide | . | zinc ABC transporter substrate-binding protein                                          |
| BLT51_RS01500 | SignalP-5.0 | signal_peptide             | . | type I 3-dehydroquinate dehydratase                                                     |

|               |             |                            |          |                                                 |
|---------------|-------------|----------------------------|----------|-------------------------------------------------|
| BLT51_RS01640 | SignalP-5.0 | lipoprotein_signal_peptide | .        | ABC transporter substrate-binding protein       |
| BLT51_RS01870 | SignalP-5.0 | signal_peptide             | .        | DUF2142 domain-containing protein               |
| BLT51_RS02030 | SignalP-5.0 | lipoprotein_signal_peptide | .        | hypothetical protein                            |
| BLT51_RS02180 | SignalP-5.0 | signal_peptide             | .        | hypothetical protein                            |
| BLT51_RS02205 | SignalP-5.0 | signal_peptide             | .        | hypothetical protein                            |
| BLT51_RS02210 | SignalP-5.0 | signal_peptide             | .        | hypothetical protein                            |
| BLT51_RS02330 | SignalP-5.0 | signal_peptide             | .        | hypothetical protein                            |
| BLT51_RS02385 | SignalP-5.0 | signal_peptide             | .        | hypothetical protein                            |
| BLT51_RS02425 | SignalP-5.0 | signal_peptide             | .        | hypothetical protein                            |
| BLT51_RS02965 | SignalP-5.0 | signal_peptide             | .        | metallophosphoesterase                          |
| BLT51_RS02970 | SignalP-5.0 | signal_peptide             | .        | peptidoglycan glycosyltransferase               |
| BLT51_RS03075 | SignalP-5.0 | lipoprotein_signal_peptide | .        | alpha/beta hydrolase                            |
| BLT51_RS03240 | SignalP-5.0 | signal_peptide             | .        | hypothetical protein                            |
| BLT51_RS03255 | SignalP-5.0 | signal_peptide             | .        | TQXA domain-containing protein                  |
| BLT51_RS03290 | SignalP-5.0 | signal_peptide             | Note=TAT | hypothetical protein                            |
| BLT51_RS03320 | SignalP-5.0 | signal_peptide             | .        | hypothetical protein                            |
| BLT51_RS03385 | SignalP-5.0 | signal_peptide             | .        | hypothetical protein                            |
| BLT51_RS03415 | SignalP-5.0 | signal_peptide             | .        | hypothetical protein                            |
| BLT51_RS03600 | SignalP-5.0 | signal_peptide             | .        | Na <sup>+</sup> /H <sup>+</sup> antiporter NhaA |
| BLT51_RS03730 | SignalP-5.0 | lipoprotein_signal_peptide | .        | DUF4300 domain-containing protein               |
| BLT51_RS03805 | SignalP-5.0 | lipoprotein_signal_peptide | .        | rhodanese-like domain-containing protein        |
| BLT51_RS03835 | SignalP-5.0 | signal_peptide             | .        | HPr family phosphocarrier protein               |
| BLT51_RS03840 | SignalP-5.0 | signal_peptide             | .        | phosphoenolpyruvate--protein phosphotransferase |
| BLT51_RS03875 | SignalP-5.0 | signal_peptide             | .        | L-lactate dehydrogenase                         |
| BLT51_RS03880 | SignalP-5.0 | lipoprotein_signal_peptide | .        | LppP/LprE family lipoprotein                    |
| BLT51_RS03920 | SignalP-5.0 | signal_peptide             | .        | ABC transporter permease                        |
| BLT51_RS03935 | SignalP-5.0 | lipoprotein_signal_peptide | .        | hypothetical protein                            |
| BLT51_RS04010 | SignalP-5.0 | signal_peptide             | .        | LytR family transcriptional regulator           |
| BLT51_RS04030 | SignalP-5.0 | signal_peptide             | .        | hypothetical protein                            |
| BLT51_RS04055 | SignalP-5.0 | lipoprotein_signal_peptide | .        | hypothetical protein                            |
| BLT51_RS04145 | SignalP-5.0 | signal_peptide             | .        | 50S ribosomal protein L11                       |

|               |             |                            |          |                                                          |
|---------------|-------------|----------------------------|----------|----------------------------------------------------------|
| BLT51_RS04405 | SignalP-5.0 | signal_peptide             | .        | hypothetical protein                                     |
| BLT51_RS04705 | SignalP-5.0 | lipoprotein_signal_peptide | .        | hypothetical protein                                     |
| BLT51_RS04785 | SignalP-5.0 | lipoprotein_signal_peptide | .        | BMP family ABC transporter substrate-binding protein     |
| BLT51_RS04950 | SignalP-5.0 | signal_peptide             | .        | hypothetical protein                                     |
| BLT51_RS05040 | SignalP-5.0 | lipoprotein_signal_peptide | .        | phosphate ABC transporter substrate-binding protein PstS |
| BLT51_RS05155 | SignalP-5.0 | signal_peptide             | .        | bifunctional metallophosphatase/5-nucleotidase           |
| BLT51_RS05220 | SignalP-5.0 | lipoprotein_signal_peptide | .        | hypothetical protein                                     |
| BLT51_RS05250 | SignalP-5.0 | signal_peptide             | .        | endonuclease/exonuclease/phosphatase family protein      |
| BLT51_RS05260 | SignalP-5.0 | lipoprotein_signal_peptide | .        | metal ABC transporter substrate-binding protein          |
| BLT51_RS05355 | SignalP-5.0 | signal_peptide             | .        | thiol:disulfide interchange protein                      |
| BLT51_RS05360 | SignalP-5.0 | lipoprotein_signal_peptide | .        | hypothetical protein                                     |
| BLT51_RS05665 | SignalP-5.0 | signal_peptide             | .        | phospholipase                                            |
| BLT51_RS05765 | SignalP-5.0 | lipoprotein_signal_peptide | .        | carbohydrate ABC transporter substrate-binding protein   |
| BLT51_RS05850 | SignalP-5.0 | signal_peptide             | .        | hypothetical protein                                     |
| BLT51_RS05855 | SignalP-5.0 | signal_peptide             | .        | HNH endonuclease                                         |
| BLT51_RS05965 | SignalP-5.0 | signal_peptide             | .        | hypothetical protein                                     |
| BLT51_RS06075 | SignalP-5.0 | signal_peptide             | .        | hypothetical protein                                     |
| BLT51_RS06095 | SignalP-5.0 | lipoprotein_signal_peptide | .        | ABC transporter                                          |
| BLT51_RS06145 | SignalP-5.0 | signal_peptide             | Note=TAT | DUF853 domain-containing protein                         |
| BLT51_RS06320 | SignalP-5.0 | lipoprotein_signal_peptide | .        | ABC transporter substrate-binding protein                |
| BLT51_RS06480 | SignalP-5.0 | signal_peptide             | .        | copper transporter                                       |
| BLT51_RS06715 | SignalP-5.0 | lipoprotein_signal_peptide | .        | hypothetical protein                                     |
| BLT51_RS06940 | SignalP-5.0 | lipoprotein_signal_peptide | .        | ABC transporter substrate-binding protein                |
| BLT51_RS07050 | SignalP-5.0 | signal_peptide             | .        | MMPL family transporter                                  |
| BLT51_RS07135 | SignalP-5.0 | signal_peptide             | .        | protein translocase subunit SecD                         |
| BLT51_RS07185 | SignalP-5.0 | lipoprotein_signal_peptide | .        | phosphatidylinositol mannoside acyltransferase           |
| BLT51_RS07445 | SignalP-5.0 | signal_peptide             | .        | hypothetical protein                                     |
| BLT51_RS07485 | SignalP-5.0 | lipoprotein_signal_peptide | .        | hypothetical protein                                     |
| BLT51_RS07670 | SignalP-5.0 | signal_peptide             | .        | TIGR01777 family protein                                 |
| BLT51_RS07735 | SignalP-5.0 | lipoprotein_signal_peptide | .        | sugar-binding protein                                    |
| BLT51_RS07990 | SignalP-5.0 | signal_peptide             | Note=TAT | damage-inducible protein CinA                            |

|               |             |                            |   |                                                |
|---------------|-------------|----------------------------|---|------------------------------------------------|
| BLT51_RS08075 | SignalP-5.0 | lipoprotein_signal_peptide | . | iron ABC transporter substrate-binding protein |
| BLT51_RS08275 | SignalP-5.0 | signal_peptide             | . | M23 family peptidase                           |
| BLT51_RS08465 | SignalP-5.0 | signal_peptide             | . | hypothetical protein                           |
| BLT51_RS08695 | SignalP-5.0 | signal_peptide             | . | hypothetical protein                           |
| BLT51_RS08715 | SignalP-5.0 | lipoprotein_signal_peptide | . | hypothetical protein                           |
| BLT51_RS08910 | SignalP-5.0 | lipoprotein_signal_peptide | . | hypothetical protein                           |
